# Supplementary material for: A Novel Method for Calcium Carbonate Deposition in Wood That Increases Carbon Dioxide Concentration and Fire Resistance
Source: MDPI journal article supplement (doi:10.3390/coatings12010072), 2022-01-07
Supplement: s1 [file s1]

# Supplementary Materials: A Novel Method for Calcium Carbonate Deposition in Wood That Increases Carbon Dioxide Concentration and Fire Resistance

Vicente Hernandez <sup>1,2,\*</sup>, Romina Romero <sup>3</sup>, Sebastián Arias <sup>2</sup> and David Contreras <sup>2,4,5</sup>

<sup>1</sup> Facultad de Ciencias Forestales, Universidad de Concepción, Victoria 631, Concepción 40730386, Chile

<sup>2</sup> Centro de Biotecnología, Universidad de Concepción, Barrio Universitario S/N, Concepción 40730386, Chile; searias@udec.cl (S.A.); dcontrer@udec.cl (D.C.)

<sup>3</sup> Laboratorio de Investigaciones Medioambientales de Zonas Áridas (LIMZA), Depto. Ingeniería Mecánica, Facultad de Ingeniería, Universidad de Tarapacá, Arica 100001, Chile; rominaromero@udec.cl

<sup>4</sup> Facultad de Ciencias Químicas, Universidad de Concepción, Edmundo Larenas 129, Concepción 4070371, Chile

<sup>5</sup> Millennium Nuclei on Catalytic Processes towards Sustainable Chemistry, Santiago 7820436, Chile

\* Correspondence: vhernandezc@udec.cl; Tel.: +56-41-2661449

## ANOVA for selected factorial model

Response 1: Weight gain (%)

Transform: Base 10 Log

Constant: 0

| Source                               | Sum of Squares | df | Mean Square | F-value | p-value  |             |
|--------------------------------------|----------------|----|-------------|---------|----------|-------------|
| <b>Model</b>                         | 2.50           | 19 | 0.1315      | 89.93   | < 0.0001 | significant |
| A-Calcium chloride concentration (%) | 0.0797         | 3  | 0.0266      | 18.16   | < 0.0001 |             |
| B-Cycles per treatment               | 2.37           | 4  | 0.5924      | 405.09  | < 0.0001 |             |
| AB                                   | 0.0495         | 12 | 0.0041      | 2.82    | 0.0029   |             |
| <b>Pure Error</b>                    | 0.1170         | 80 | 0.0015      |         |          |             |
| <b>Cor Total</b>                     | 2.62           | 99 |             |         |          |             |

**Citation:** Hernandez, V.; Romero, R.; Arias, S.; Contreras, D. A Novel Method for Calcium Carbonate Deposition in Wood that Increases Carbon Dioxide Concentration and Fire Resistance. *Coatings* **2022**, *12*, 72. <https://doi.org/10.3390/coatings12010072>

Academic Editor: Giorgos Skordaris

Received: 10 December 2021

Accepted: 4 January 2022

Published: 7 January 2022

**Publisher's Note:** MDPI stays neutral with regard to jurisdictional claims in published maps and institutional affiliations.

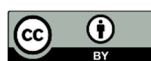

**Copyright:** © 2022 by the authors. Submitted for possible open access publication under the terms and conditions of the Creative Commons Attribution (CC BY) license (<https://creativecommons.org/licenses/by/4.0/>).

Figure S1. Analysis of variance of CaCO<sub>3</sub> mineralized samples.

## ANOVA for selected factorial model

Response 1: Weight loss

| Source            | Sum of Squares | df | Mean Square | F-value | p-value |             |
|-------------------|----------------|----|-------------|---------|---------|-------------|
| <b>Model</b>      | 7371.13        | 2  | 3685.57     | 5.58    | 0.0194  | significant |
| A-Treatment       | 7371.13        | 2  | 3685.57     | 5.58    | 0.0194  |             |
| <b>Pure Error</b> | 7929.42        | 12 | 660.79      |         |         |             |
| <b>Cor Total</b>  | 15300.56       | 14 |             |         |         |             |

Figure S2. Analysis of variance of weight losses after fire-resistance test.

## ANOVA for selected factorial model

Response 1: Carbonization index

| Source            | Sum of Squares | df | Mean Square | F-value | p-value |             |
|-------------------|----------------|----|-------------|---------|---------|-------------|
| <b>Model</b>      | 2.676E+10      | 2  | 1.338E+10   | 5.78    | 0.0175  | significant |
| A-Treatment       | 2.676E+10      | 2  | 1.338E+10   | 5.78    | 0.0175  |             |
| <b>Pure Error</b> | 2.779E+10      | 12 | 2.316E+09   |         |         |             |
| <b>Cor Total</b>  | 5.455E+10      | 14 |             |         |         |             |

Figure S3. Analysis of variance of carbonization index after fire-resistance test.
